# Supplementary material
Source: PubMed Central journal article supplement (PMC3625267)
Supplement: 1216719110_pnas.201216719SI.pdf [file 1216719110_pnas.201216719SI.pdf]

# Supporting Information

Brévault et al. 10.1073/pnas.1216719110

## SI Materials and Methods

**Percentage of Non-*Bacillus thuringiensis* (Bt) and Bt Cotton from 1997 to 2012.** We used data from U.S. Department of Agriculture–Agricultural Marketing Service (1) to tabulate percentages of non-Bt and Bt cotton with one and two toxins in three states (Georgia, Arkansas, and Mississippi) and the United States globally from 1997 to 2012 (Fig. 1 and Fig. S1).

**Toxin Concentration in Plants.** We used ELISA (Qualiplate kit, Envirologix) to measure the Bt toxin concentrations in fresh terminal leaves of cotton plants (Cry1Ac in DP 448 B; Cry1Ac and Cry2Ab in DP 164 B2RF). Arbitrarily selected plants were sampled every 2 wk, between 38 DAP (presquaring stage) and 95 DAP (late fruiting stage). A single leaf was sampled per plant and a total of 10 leaves per cultivar were collected on any given date. Leaves were stored at  $-80^{\circ}\text{C}$ . At the time of analysis, a leaf punch sample (15–20 mg) was taken for each leaf by snapping the 1.5 mL Eppendorf tube cap down on the leaf. Extraction buffer (0.5 mL) was added to the tube and the plant tissue was grinded with a pestle. Sample extracts were diluted with the buffer solution at 1:11/1:51 and 1:201 for Cry1Ac and Cry2Ab, respectively, to bring assay results within the range of calibration. The optical density of Cry1Ac and Cry2Ab calibrators from purified toxin solution was measured using a spectrophotometer (microtiter plate reader) to establish the standard curve. The concentrations of Cry1Ac and Cry2Ab in samples ( $\mu\text{g}\cdot\text{g}^{-1}$  fresh tissue) were calculated based on concentration levels from the standard curve (parts per billion).

**Population Genetics Model.** We simulated the evolution of *Helicoverpa zea* resistance to two-toxin cotton using a deterministic population genetic model with two unlinked autosomal loci, similar to models used by Gould (2), Alstad (3), Gould et al. (4) and Hamilton (5). Locus 1 affected responses to Cry1Ac and locus 2 affected responses to Cry2Ab. Each locus had two alleles:  $r_1$  and  $r_2$  conferring resistance and  $s_1$  and  $s_2$  susceptibility to Cry1Ac and Cry2Ab, respectively. We assumed random mating and initial gametic equilibrium. When we used the input parameters of Alstad (3) and Hamilton (5) in our model, our model's projections agreed with the projections from those two models.

We assumed that host plants either produced no Bt toxins (non-Bt refuge plants) or two Bt toxins (Cry1Ac and Cry2Ab). For *H. zea* and two-toxin cotton, this is an unrealistically optimistic scenario, because two-toxin cotton and Cry1Ac cotton overlapped for about 7 y in the United States (Fig. 1 and Fig. S1). The overlap with one- and two-toxin cotton would yield faster evolution of resistance to two-toxin cotton than the scenario we modeled with no one-toxin cotton (4, 6, 7). Thus, our assumption of no overlap between Cry1Ac cotton and two-toxin cotton favors overestimation of the time for resistance to two-toxin cotton. We assumed a 10% refuge of non-Bt host plants in most simulations (Fig. 5), but also examined effects of 10%, 25%, and 50% refuges under some conditions (Fig. 6).

The initial frequency of  $r_2$  was 0.001 in all simulations, which represents an ideal condition based on the assumption of little or no previous exposure to Cry2Ab. We evaluated two assumptions for the initial frequency of  $r_1$ : 0.001 and 0.1. For  $r_1$ , an initial frequency of 0.001 is unrealistically optimistic for evaluating responses to two-toxin cotton in *H. zea*, because two-toxin cotton was first registered in 2002, 7 y after Cry1Ac cotton was registered (8). By 2009, the first year in which two-

toxin cotton exceeded 50% of Bt cotton in the United States (Fig. 1), *H. zea* had been exposed to Cry1Ac cotton for more than a decade and evidence of field-evolved resistance to Cry1Ac had been reported for some *H. zea* populations in the southeastern United States (9, 10). Therefore, an initial frequency of 0.1 for  $r_1$  is probably an underestimate for some populations, which would favor overestimation of the time to resistance.

The fitness of doubly susceptible homozygotes ( $s_1s_1s_2s_2$ ) on non-Bt plants was 1. Because we did not detect significant fitness costs reducing survival on non-Bt cotton (Fig. 2), the fitness of all other genotypes on non-Bt plants was also 1 and we simulated three generations per year to correspond with the three generations per year *H. zea* develops on cotton in some areas of the southeastern United States (9, 10).

We used four sets of genotype-specific fitness parameters on two-toxin cotton (Table S3) corresponding to four sets of assumptions about the dominance of resistance and redundant killing: (i) completely recessive resistance ( $h_p = 0$ ) and complete redundant killing [redundant killing factor ( $RKF$ ) = 1] (ideal conditions), (ii) completely recessive resistance ( $h_p = 0$ ) and partial redundant killing ( $RKF = 0.64$ , based on empirical data in Fig. 2), (iii) partially recessive resistance ( $h_p = 0.25$ ) and complete redundant killing, and (iv) partially recessive resistance ( $h_p = 0.25$ ) and partial redundant killing ( $RKF = 0.64$ ).

For each generation, we simulated selection with a set of standard equations (11, 12), using the fitness parameters for each of the nine genotypes on two-toxin cotton (Table S3).

First, we calculated the mean fitness of each gamete  $i$ , based on the weighted mean fitness of each genotype containing gamete  $i$ :

$$\bar{w}_i = \sum_{j=1}^4 x_j w_{ij},$$

where  $i$  is  $r_1r_2$ ,  $r_1s_2$ ,  $s_1r_2$ , or  $s_1s_2$ ;  $j = 1-4$  represents  $r_1r_2$ ,  $r_1s_2$ ,  $s_1r_2$ , and  $s_1s_2$ , respectively;  $x_j$  is the frequency of any gamete  $j$ ; and  $w_{ij}$  is the fitness of the larval genotype containing gametes  $i$  and  $j$ . Next, we calculated the mean fitness of the pest population as the sum of mean fitnesses of the gametes, weighted by the frequencies of the gametes:

$$\bar{w} = \sum_{i=1}^4 x_i \bar{w}_i,$$

where  $i = 1-4$  represents  $r_1r_2$ ,  $r_1s_2$ ,  $s_1r_2$ , and  $s_1s_2$ , respectively, and  $x_i$  is the frequency of any gamete  $i$ .

Gametic disequilibrium ( $D$ ), which is generated by directional selection, was calculated in each generation as:

$$D = (x_{r_1r_2} * x_{s_1s_2}) - (x_{r_1s_2} * x_{s_1r_2}).$$

We assumed the two loci segregated independently, which means the rate of recombination between loci during meiosis ( $c$ ) was 0.5 (4, 12). With  $w_H$  representing the fitness of the double heterozygote ( $r_1s_1r_2s_2$ ), we calculated the frequency of a gamete  $i$  after each generation of selection ( $x'_i$ ) as:

$$x'_i = \frac{x_i \bar{w}_i - c w_H D}{\bar{w}},$$

for the  $r_1r_2$  and  $s_1s_2$  gametes, and as:

$$x_i' = \frac{x_i \bar{w}_i + c w_H D}{\bar{w}},$$

for the  $r_1s_2$  and  $s_1r_2$  gametes.

At the end of each year, based on random mating, we calculated the frequency of each of the nine insect genotypes from the gamete frequencies. For example, the frequency of  $r_1r_1r_2r_2$  was  $(x_{r_1r_2})^2$ , the frequency of  $r_1r_1r_2s_2$  was  $2(x_{r_1r_2})(x_{r_1s_2})$ , and  $r_1s_1r_2s_2$  was  $2(x_{r_1r_2})(x_{s_1s_2}) + 2(x_{r_1s_2})(x_{s_1r_2})$ .

We calculated fitness on two-toxin cotton as the sum of the fitness values of the nine genotypes on two-toxin cotton weighted by the proportion of each genotype in the population. The time to resistance was the number of years until population fitness on two-toxin cotton at the end of the year was  $\geq 0.25$ .

If initial frequency is equal for  $r_1$  and  $r_2$ , and fitness on two-toxin cotton is 1 for doubly resistant homozygotes ( $r_1r_1r_2r_2$ ) and 0 for all other genotypes, our resistance criterion is met when the frequency of  $r_1$  and  $r_2$  reaches 0.71, yielding a frequency of 0.25 for  $r_1r_1r_2r_2$  and 0.25 fitness for the population. In this case, the resistance criterion used here takes longer to reach than the criterion applied in most previous studies. For example, the criterion used by Gould et al. (4), Onstad and Meinke (7), and Ives et al. (13) was a frequency of 0.5 for  $r_1$  and  $r_2$ , which yields a frequency 0.063 for  $r_1r_1r_2r_2$ . Under most conditions, the increase in frequency of  $r_1$  and  $r_2$  from 0.5 to 0.71 occurs in one or a few generations, so this difference in criteria has relatively little impact when the frequency is equal for  $r_1$  and  $r_2$ . However, with a higher initial fre-

quency of  $r_1$  (i.e., 0.1) than  $r_2$  (0.001) and partial redundant killing, the criterion of  $\geq 0.25$  fitness can be met substantially before both  $r_1$  and  $r_2$  reach a frequency  $\geq 0.5$ . For example, if fitness of  $r_1r_1s_2s_2$  on two-toxin cotton is  $>0.25$ , a population fitness of  $\geq 0.25$  can be achieved with a high frequency of  $r_1$ , even if the frequency of  $r_2$  remains low.

**Toxin Concentration in Plants.** The results in our study are similar to previous results in terms of the relative toxicity of Cry1Ac and Cry2Ab to *H. zea* and the concentrations of these toxins in Bt cotton plants. In diet bioassays with a susceptible strain, the toxin concentration causing 50% mortality ( $LC_{50}$ ) of Cry2Ab relative to Cry1Ac was fivefold higher in our study and 20-fold higher in a previous study (14). The concentration of Cry2Ab relative to Cry1Ac in terminal leaves was 43-fold higher at the presquaring stage and 10-fold higher at the fruiting stage, when insects were first fed material from cotton plants in our study, and 33-fold higher for 75-d-old plants in a previous study (14).

The Cry1Ac concentrations measured in our study over the growing season in one- and two-toxin cotton are within the range measured in 13 commercial cultivars producing only Cry1Ac (15, 16). The two-toxin cotton cultivar used in our experiment (DP 164 B2RF) contains Bt genes from event MON 15985 (17). The concentrations of Cry2Ab measured in our study were equivalent or higher than concentrations reported for event MON 15985 (18, 19). Furthermore, similar to our results, levels of Cry2Ab in leaf samples of MON 15985 significantly declined to a mean of  $16.7 \mu\text{g}\cdot\text{g}^{-1}$  of fresh leaves 108 d after planting (18).

1. USDA-AMS (2012) *Cotton Varieties Planted*, USDA, AMS, Cotton and Tobacco Programs. [www.ams.usda.gov/mnreports/cnavar.pdf](http://www.ams.usda.gov/mnreports/cnavar.pdf).
2. Gould F (1986) Simulation models for predicting durability of insect-resistant germ plasm: A deterministic diploid, two-locus model. *Environ Entomol* 15(1):1–10.
3. Alstad D (2005) *Populus Java Version 5.4* (Department of Ecology, Evolution, and Behavior, University of Minnesota). [www.cbs.umn.edu/populus/](http://www.cbs.umn.edu/populus/).
4. Gould F, Cohen MB, Bentur JS, Kennedy GG, Van Duyn J (2006) Impact of small fitness costs on pest adaptation to crop varieties with multiple toxins: A heuristic model. *J Econ Entomol* 99(6):2091–2099.
5. Hamilton MB (2009) *Population Genetics* (Wiley-Blackwell, Hoboken, NJ), 407 pp. Interact Box 2.5 Spreadsheet Simulation available at: [www.blackwellpublishing.com/hamiltongenetics/chapter\\_resources.asp](http://www.blackwellpublishing.com/hamiltongenetics/chapter_resources.asp).
6. Zhao JZ, et al. (2005) Concurrent use of transgenic plants expressing a single and two *Bacillus thuringiensis* genes speeds insect adaptation to pyramided plants. *Proc Natl Acad Sci USA* 102(24):8426–8430.
7. Onstad DW, Meinke LJ (2010) Modeling evolution of *Diabrotica virgifera virgifera* (Coleoptera: Chrysomelidae) to transgenic corn with two insecticidal traits. *J Econ Entomol* 103(3):849–860.
8. Tabashnik BE, Van Rensburg JBJ, Carrière Y (2009) Field-evolved insect resistance to Bt crops: Definition, theory, and data. *J Econ Entomol* 102(6):2011–2025.
9. Tabashnik BE, Gassmann AJ, Crowder DW, Carrière Y (2008) Insect resistance to Bt crops: Evidence versus theory. *Nat Biotechnol* 26(2):199–202.
10. Gustafson DI, Head GP, Caprio MA (2006) Modeling the impact of alternative hosts on *Helicoverpa zea* adaptation to bollgard cotton. *J Econ Entomol* 99(6):2116–2124.
11. Futuyma DJ (1979) *Evolutionary Biology* (Sinauer Associates Inc., Sunderland, MA), 565 pp.
12. Gillespie JH (2004) *Population Genetics: A Concise Guide* (John Hopkins Univ Press, Baltimore), 2nd Ed, 214 pp.
13. Ives AR, Glaum PR, Ziebarth NL, Andow DA (2011) The evolution of resistance to two-toxin pyramid transgenic crops. *Ecol Appl* 21(2):503–515.
14. Sivasubramanian S, et al. (2008) Toxicity and characterization of cotton expressing *Bacillus thuringiensis* Cry1Ac and Cry2Ab2 proteins for control of lepidopteran pests. *J Econ Entomol* 101(2):546–554.
15. Adamczyk JJ, Sumerford DV (2001) Potential factors impacting seasonlong expression of Cry1Ac in 13 commercial varieties of Bollgard cotton. *J Insect Sci* 1:13.
16. Adamczyk JJ, Hardee DD, Adams LC, Sumerford DV (2001) Correlating differences in larval survival and development of bollworm (Lepidoptera: Noctuidae) and fall armyworm (Lepidoptera: Noctuidae) to differential expression of Cry1A(c) delta-endotoxin in various plant parts among commercial cultivars of transgenic *Bacillus thuringiensis* cotton. *J Econ Entomol* 94(1):284–290.
17. Burdett PL, Hugie WV, Shoemaker DB (2009) *Cotton Cultivar DP 164 B2RF - Patent 7635801*. [www.docstoc.com/docs/57660804/Cotton-Cultivar-DP-164-B2RF-Patent-7635801](http://www.docstoc.com/docs/57660804/Cotton-Cultivar-DP-164-B2RF-Patent-7635801).
18. Monsanto (2003) *Safety Assessment of Bollgard II Cotton Event 15985*. [www.monsanto.com/products/Documents/safety-summaries/bollgard\\_II\\_pss.pdf](http://www.monsanto.com/products/Documents/safety-summaries/bollgard_II_pss.pdf).
19. Greenplate JT, et al. (2000) Bollgard II efficacy: Quantification of total lepidopteran activity in a 2-gene product. *Proceedings, Beltwide Cotton Conferences*, eds Dugger P, Richter D (National Cotton Council of America, Memphis, TN), pp 1041–1043.



**Table S1. Responses of *H. zea* to Cry1Ab toxin incorporated in diet**

| Strain | <i>N</i> | LC <sub>50</sub> (μg·ml <sup>-1</sup> ) | 95% Fiducial limits |       | Slope |
|--------|----------|-----------------------------------------|---------------------|-------|-------|
|        |          |                                         | Lower               | Upper |       |
| GA     | 288      | 63                                      | 25                  | 110   | 1.2   |
| GA-R   | 288      | 940                                     | 130                 | 7,000 | 1.1   |

GA, field-derived strain from Georgia; GA-R, resistant strain derived from the GA strain and selected with Cry1Ac in the laboratory; *N*, number of larvae tested.

**Table S2. Selection experiments followed by diet bioassays to assess cross-resistance between Cry1A and Cry2A toxins in eight species of lepidopteran pests**

| Species                                                     | Strain            | Selected with | Cross-resistant to | Parameter        | CRR  | Ref.       |
|-------------------------------------------------------------|-------------------|---------------|--------------------|------------------|------|------------|
| Significant cross-resistance detected in individual studies |                   |               |                    |                  |      |            |
| <i>Heliothis virescens</i>                                  | CP73-3            | Cry1Ac        | Cry2A              | LC <sub>50</sub> | 53   | 1          |
|                                                             | YHD2              | Cry1Ac        | Cry2A              | LC <sub>50</sub> | 15   | 2          |
|                                                             | KCBhyb            | Cry2Aa        | Cry1Ac             | LC <sub>50</sub> | 188  | 3          |
|                                                             | CXC               | Cry2Aa        | Cry1Ac             | LC <sub>50</sub> | 289  | 3          |
| <i>Helicoverpa zea</i>                                      | Not named         | Cry1Ac        | Cry2Aa             | LC <sub>50</sub> | 3.3  | 4          |
| <i>Pectinophora gossypiella</i>                             | BX-R1             | Cry2Ab        | Cry1Ac             | LC <sub>50</sub> | 420  | 5          |
|                                                             | BX-R2             | Cry2Ab        | Cry1Ac             | LC <sub>50</sub> | 21   | 5          |
| Cross-resistance not significant in individual studies      |                   |               |                    |                  |      |            |
| <i>Diatraea saccharalis</i>                                 | Cry1Ab-RR         | Cry1Ab        | Cry2Ab             | LC <sub>50</sub> | 0.51 | 6          |
| <i>Helicoverpa armigera</i>                                 | SP15              | Cry2Ab        | Cry1Ac             | LC <sub>50</sub> | 1.54 | 7          |
|                                                             | GYBT              | Cry1Ac        | Cry2Aa             | LC <sub>50</sub> | 1.40 | 8          |
|                                                             | BtR               | Cry1Ac        | Cry2Ab             | IC <sub>50</sub> | 1.09 | 9          |
|                                                             | LFR <sub>10</sub> | Cry1Ac        | Cry2Ab             | IC <sub>50</sub> | 1.01 | 9          |
|                                                             | Not named         | Cry1Ac        | Cry2Ab             | LC <sub>50</sub> | 1.05 | 10         |
|                                                             | BX                | Cry1Ac        | Cry2Ab             | LC <sub>50</sub> | 1.4  | 11         |
|                                                             | SCD-r1            | Cry1Ac        | Cry2Aa             | LC <sub>50</sub> | 1.2  | 12         |
| <i>Helicoverpa punctigera</i>                               | Hp4.13            | Cry2Ab        | Cry1Ac             | LC <sub>50</sub> | 1.58 | 13         |
|                                                             | Hp4.13            | Cry2Ab        | Cry1Ab             | LC <sub>50</sub> | 0.32 | 13         |
| <i>Helicoverpa zea</i>                                      | AR                | Cry1Ac        | Cry2Aa             | LC <sub>50</sub> | 1.55 | 14         |
|                                                             | GA-R              | Cry1Ac        | Cry2Ab             | LC <sub>50</sub> | 1.98 | This study |
| <i>Plutella xylostella</i>                                  | SZBT              | Cry1Ac        | Cry2Aa             | LC <sub>50</sub> | 1.20 | 15         |
| <i>Trichoplusia ni</i>                                      | GLEN-Cry1Ac-BCS   | Cry1Ac        | Cry2Ab             | IC <sub>50</sub> | 2.24 | 16         |

The cross-resistance ratio (CRR) is the LC<sub>50</sub> (concentration killing 50%) or IC<sub>50</sub> (concentration causing 50% inhibition of growth) of the toxin that was not used in selection for a selected strain divided by the LC<sub>50</sub> or IC<sub>50</sub> of the same toxin for an unselected control strain. CRR > 1 indicates that the selected strain was cross-resistant to the toxin not used in selection. For example, in the CP73-3 strain of *H. virescens*, selection with Cry1Ac increased the LC<sub>50</sub> of Cry2A of the selected strain by 53-fold relative to the unselected strain, yielding CRR = 53. In one study not reported in the table (17), bioassays evaluated survival of *P. gossypiella* strains selected for resistance to Cry1Ac and unselected strains to individual concentrations of Cry2Aa. Comparisons of survival of the three selected strains to the survival of two unselected strains at a concentration of 1 μg of Cry2Aa per ml of diet showed significantly higher survival in the selected than unselected strains. Survival of the unselected strain at that concentration was 0, which precludes calculation of a resistance ratio.

- Gould F, et al. (1992) Broad-spectrum resistance to *Bacillus thuringiensis* toxins in *Heliothis virescens*. *Proc Natl Acad Sci USA* 89(17):7986–7990.
- Gould F, Anderson A, Reynolds A, Bumgarner L, Moar W (1995) Selection and genetic analysis of a *Heliothis virescens* (Lepidoptera, Noctuidae) strain with high levels of resistance to *Bacillus thuringiensis* toxins. *J Econ Entomol* 88(6):1545–1559.
- Jurat-Fuentes JL, Gould FL, Adang MJ (2003) Dual resistance to *Bacillus thuringiensis* Cry1Ac and Cry2Aa toxins in *Heliothis virescens* suggests multiple mechanisms of resistance. *Appl Environ Microbiol* 69(10):5898–5906.
- Burd AD, Bradley JR, Van Duyn JW, Gould F (2000) Resistance of bollworm, *Helicoverpa zea*, to Cry1A(c) toxin. *Proceedings, 2000 Beltwide Cotton Conferences, 4-8 January 2000, San Antonio, TX*, eds Dugger CP, Richter DA (National Cotton Council of America, Memphis, TN), pp 923–926.
- Tabashnik BE, et al. (2009) Asymmetrical cross-resistance between *Bacillus thuringiensis* toxins Cry1Ac and Cry2Ab in pink bollworm. *Proc Natl Acad Sci USA* 106(29):11889–11894.
- Wu X, et al. (2009) Susceptibility of Cry1Ab-resistant and -susceptible sugarcane borer (Lepidoptera: Crambidae) to four *Bacillus thuringiensis* toxins. *J Invertebr Pathol* 100(1):29–34.
- Mahon RJ, Olsen KM, Garsia KA, Young SR (2007) Resistance to *Bacillus thuringiensis* toxin Cry2Ab in a strain of *Helicoverpa armigera* (Lepidoptera: Noctuidae) in Australia. *J Econ Entomol* 100(3):894–902.
- Xu X, Yu L, Wu Y (2005) Disruption of a cadherin gene associated with resistance to Cry1Ac  $\delta$ -endotoxin of *Bacillus thuringiensis* in *Helicoverpa armigera*. *Appl Environ Microbiol* 71(2):948–954.
- Luo S, et al. (2007) Cross-resistance studies of Cry1Ac-resistant strains of *Helicoverpa armigera* (Lepidoptera: Noctuidae) to Cry2Ab. *J Econ Entomol* 100(3):909–915.
- Rajagopal R, et al. (2009) Resistance of *Helicoverpa armigera* to Cry1Ac toxin from *Bacillus thuringiensis* is due to improper processing of the protoxin. *Biochem J* 419(2):309–316.
- Akhurst RJ, James W, Bird LJ, Beard C (2003) Resistance to the Cry1Ac  $\delta$ -endotoxin of *Bacillus thuringiensis* in the cotton bollworm, *Helicoverpa armigera* (Lepidoptera: Noctuidae). *J Econ Entomol* 96(4):1290–1299.
- Yang YH, et al. (2009) Introgression of a disrupted cadherin gene enables susceptible *Helicoverpa armigera* to obtain resistance to *Bacillus thuringiensis* toxin Cry1Ac. *Bull Entomol Res* 99(2):175–181.

13. Caccia S, et al. (2010) Binding site alteration is responsible for field-isolated resistance to *Bacillus thuringiensis* Cry2A insecticidal proteins in two *Helicoverpa* species. *PLoS ONE* 5(4): e9975.
14. Anilkumar KJ, et al. (2008) Production and characterization of *Bacillus thuringiensis* Cry1Ac-resistant cotton bollworm *Helicoverpa zea* (Boddie). *Appl Environ Microbiol* 74(2):462–469.
15. Gong Y, Wang C, Yang Y, Wu S, Wu Y (2010) Characterization of resistance to *Bacillus thuringiensis* toxin Cry1Ac in *Plutella xylostella* from China. *J Invertebr Pathol* 104(2):90–96.
16. Wang P, et al. (2007) Mechanism of resistance to *Bacillus thuringiensis* toxin Cry1Ac in a greenhouse population of the cabbage looper, *Trichoplusia ni*. *Appl Environ Microbiol* 73(4): 1199–1207.
17. Tabashnik BE, et al. (2002) Control of resistant pink bollworm by transgenic cotton with *Bacillus thuringiensis* Toxin Cry2Ab. *Appl Environ Microbiol* 68(8):3790–3794.

**Table S3. Fitness of the nine insect genotypes on two-toxin Bt cotton producing Cry1Ac and Cry2Ab as a function of dominance ( $h_p$ ) and RKF**

| Conditions |      | Genotype-specific fitness |                |                |                |                |                |                |                |                |
|------------|------|---------------------------|----------------|----------------|----------------|----------------|----------------|----------------|----------------|----------------|
| $h_p$      | RKF  | $r_1r_1r_2r_2$            | $r_1r_1r_2s_2$ | $r_1r_1s_2s_2$ | $r_1s_1r_2r_2$ | $r_1s_1r_2s_2$ | $r_1s_1s_2s_2$ | $s_1s_1r_2r_2$ | $s_1s_1r_2s_2$ | $s_1s_1s_2s_2$ |
| 0          | 1    | 0.80                      | 0.036          | 0.036          | 0.036          | 0.036          | 0.036          | 0.036          | 0.036          | 0.036          |
| 0          | 0.64 | 0.80                      | 0.40           | 0.40           | 0.40           | 0.036          | 0.036          | 0.40           | 0.036          | 0.036          |
| 0.25       | 1    | 0.80                      | 0.51           | 0.036          | 0.51           | 0.23           | 0.036          | 0.036          | 0.036          | 0.036          |
| 0.25       | 0.64 | 0.80                      | 0.51           | 0.40           | 0.51           | 0.23           | 0.036          | 0.40           | 0.036          | 0.036          |

The fitness of the double homozygotes was fixed in all simulations, while we varied the fitness of the other seven genotypes depending on dominance ( $h_p$ ) and the RKF, as explained below. *Fitness of  $s_1s_1s_2s_2$* : The extensive field data of Jackson et al. (1) for susceptible populations of *H. zea* from North Carolina show that survival of susceptible *H. zea* on two-toxin Bt cotton (producing Cry1Ac and Cry2Ab) relative to non-Bt cotton was 3.6% (2). We defined fitness of  $s_1s_1s_2s_2$  on non-Bt cotton as 1 and assumed that fitness on two-toxin cotton relative to non-Bt cotton is proportional to survival on two-toxin cotton relative to non-Bt cotton. Thus, we used 0.036 as the fitness of  $s_1s_1s_2s_2$  on two-toxin cotton. *Fitness of  $r_1r_1r_2r_2$* : The fitness of  $r_1r_1r_2r_2$  on two-toxin Bt plants is sometimes set at 1 in modeling studies, indicating complete resistance (3–5). Here we set the fitness of  $r_1r_1r_2r_2$  at 0.80 to account for incomplete resistance, which typically occurs for one-toxin plants (6) and is likely for two-toxin plants. Fitness of  $r_1r_1r_2r_2$  of 0.8 rather than 1 tends to slightly slow evolution of resistance. *Fitness of the other seven genotypes*: The fitness of the seven genotypes other than the double homozygotes depended on dominance ( $h_p = 0$  or 0.25) and redundant killing (RKF = 1 or 0.64), as explained below. To estimate the fitness of one genotype relative to another from empirical data, we assumed that the relative fitness of different genotypes on two-toxin plants is proportional to their relative survival on two-toxin plants. We also assumed that each locus contributed equally to fitness on two-toxin plants, so fitness was equal within the following pairs of genotypes:  $r_1r_1r_2s_2$  and  $r_1s_1r_2r_2$ ,  $r_1r_1s_2s_2$  and  $s_1s_1r_2r_2$ , and  $r_1s_1s_2s_2$  and  $s_1s_1r_2s_2$ . *Dominance*: Dominance ( $h$ ) is calculated for a single resistance locus as:

$$h = (W_{rs} - W_{ss}) / (W_{rr} - W_{ss}), \quad [S1]$$

where  $W_{ss}$ ,  $W_{rs}$ , and  $W_{rr}$  are the fitnesses of  $ss$ ,  $rs$ , and  $rr$ , respectively (7). Values of  $h$  vary from 0 for completely recessive resistance to 1 for completely dominant resistance. We extended this to two loci, with dominance of resistance to two-toxin plants defined as:

$$h_p = (W_{r_1s_1r_2s_2} - W_{s_1s_1s_2s_2}) / (W_{r_1r_1r_2r_2} - W_{s_1s_1s_2s_2}). \quad [S2]$$

Values of  $h_p$  vary from 0 for completely recessive resistance to 1 for completely dominant resistance. We rearranged Eq. S2 to solve for the fitness of double heterozygotes:

$$W_{r_1s_1r_2s_2} = h_p(W_{r_1r_1r_2r_2} - W_{s_1s_1s_2s_2}) + W_{s_1s_1s_2s_2}. \quad [S3]$$

*Redundant killing*. We define the RKF as:

$$RKF = 1 - (W_{r_1r_1s_2s_2} - W_{s_1s_1s_2s_2}), \quad [S4]$$

where  $W_{s_1s_1s_2s_2}$  and  $W_{r_1r_1s_2s_2}$  are the fitnesses on two-toxin cotton of  $s_1s_1s_2s_2$  and  $r_1r_1s_2s_2$ , respectively. The value of RKF varies from 0 for no redundant killing to 1 for complete redundant killing, which means the fitness on two-toxin cotton is equal for  $r_1r_1s_2s_2$  and  $s_1s_1s_2s_2$ . Lack of complete redundant killing ( $RKF < 1$ ) can be caused by any factors causing  $W_{r_1r_1s_2s_2} > W_{s_1s_1s_2s_2}$ . One such factor is cross-resistance to toxin 2 caused by selection with toxin 1. However,  $RKF < 1$  can occur without cross-resistance. For example, this can happen when the concentration of toxin 2 declines seasonally so that it is not high enough to cause mortality. In this case, fitness is not affected by toxin 2 or locus 2, yielding  $W_{r_1r_1} > W_{s_1s_1}$  and  $RKF < 1$ . RKF is most useful as an index of redundant killing when fitness of  $s_1s_1s_2s_2$  is close to 0 and becomes less useful as  $s_1s_1s_2s_2$  approaches 1. In our modeling, we assumed that fitness was the same for  $r_1r_1s_2s_2$  and  $s_1s_1r_2r_2$ , but if these genotypes do not have equal fitness, RKF can be evaluated separately for each of the two genotypes. Although other formulas could be conceived for measuring the extent of redundant killing, Eq. S4 for calculating RKF is particularly useful because it focuses on the extent of the increase in fitness of  $r_1r_1s_2s_2$  and  $s_1s_1r_2r_2$  relative to fitness of  $s_1s_1s_2s_2$ . As this key difference increases, resistance is expected to evolve faster. Relative to fitness of  $s_1s_1s_2s_2$ , increased fitness of  $r_1r_1s_2s_2$  and  $s_1s_1r_2s_2$  would also accelerate resistance evolution. This condition would also yield increased fitness of  $r_1r_1s_2s_2$  and  $s_1s_1r_2r_2$  relative to  $s_1s_1s_2s_2$  and thus would be reflected in RKF based on Eq. S4. *Ideal and data-based assumptions about fitness*: Under ideal conditions, resistance is completely recessive ( $h_p = 0$ ) and complete redundant killing occurs ( $RKF = 1$ ), yielding a fitness advantage relative to doubly susceptible homozygotes ( $s_1s_1s_2s_2$ ) only for doubly resistant homozygotes ( $r_1r_1r_2r_2$ ). The experimental results here (Fig. 2) show that survival on two-toxin cotton was 11 times higher for the GA-R strain (6.7%) selected for resistance to Cry1Ac than for its parent strain GA (0.6%) (Fig. 2). We assumed that GA-R individuals were  $r_1r_1s_2s_2$  and GA individuals were  $s_1s_1s_2s_2$ . Based on the assumptions described above that the fitness of  $s_1s_1s_2s_2$  is 0.036 and the relative fitness of different genotypes on two-toxin plants is proportional to their relative survival on two-toxin plants, we estimated the fitness of  $r_1r_1s_2s_2$  on two-toxin plants as  $0.036 \times (6.7\%/0.06\%) = 0.40$ . Applying Eq. S4, this yields  $RKF = 0.64$ . With  $h_p = 0$  and  $RKF = 0.64$ , a fitness advantage relative to doubly susceptible homozygotes occurs for four genotypes other than  $r_1r_1r_2r_2$ :  $r_1r_1s_2s_2$ ,  $r_1r_1r_2s_2$ ,  $s_1s_1r_2r_2$ , and  $s_1s_1r_2s_2$  (fitness = 0.40). Because GA apparently had some resistance alleles, we infer that the survival of  $s_1s_1s_2s_2$  would be equal to or less than survival of GA, which would yield an equal or lower value of RKF. Because resistance evolves faster with less redundant killing (lower RKF) (Figs. 5 and 6), our assumption of  $RKF = 0.64$  would favor accurate estimation or overestimation of the time for resistance to evolve. Based on our experimental data,  $h = 0.25$  for resistance to Cry1Ac cotton (Fig. 2). We assumed that  $h_p$  was also 0.25 for two-toxin cotton. Applying Eq. S3, with  $h_p = 0.25$ ,  $W_{r_1r_1r_2r_2} = 0.8$ , and  $W_{s_1s_1s_2s_2} = 0.036$  yields  $W_{r_1s_1r_2s_2} = 0.227$  (rounded to 0.23). Our estimate of  $h = 0.25$  on Cry1Ac cotton is lower than a previous estimate of  $h = 0.83$  based on responses of *H. zea* to Cry1Ac in diet (8, 9). With  $h_p = 0.25$ , we calculated the fitness of the two genotypes with three resistance alleles ( $r_1r_1r_2s_2$  and  $r_1s_1r_2r_2$ ) as the mean fitness of the double heterozygotes (fitness = 0.227) and the doubly resistant homozygotes  $[(0.227 + 0.80)/2 = 0.514]$ , rounded to 0.51.

1. Jackson RE, Bradley JR, Jr., Van Duyn JW, Gould F (2004) Comparative production of *Helicoverpa zea* (Lepidoptera: Noctuidae) from transgenic cotton expressing either one or two *Bacillus thuringiensis* proteins with and without insecticide oversprays. *J Econ Entomol* 97(5):1719–1725.
2. Tabashnik BE, Van Rensburg JBJ, Carrière Y (2009) Field-evolved insect resistance to Bt crops: Definition, theory, and data. *J Econ Entomol* 102(6):2011–2025.
3. Gould F, Cohen MB, Bentur JS, Kennedy GG, Van Duyn J (2006) Impact of small fitness costs on pest adaptation to crop varieties with multiple toxins: A heuristic model. *J Econ Entomol* 99(6):2091–2099.

4. Ives AR, Glaum PR, Ziebarth NL, Andow DA (2011) The evolution of resistance to two-toxin pyramid transgenic crops. *Ecol Appl* 21(2):503–515.
5. Zhao JZ, et al. (2005) Concurrent use of transgenic plants expressing a single and two *Bacillus thuringiensis* genes speeds insect adaptation to pyramided plants. *Proc Natl Acad Sci USA* 102(24):8426–8430.
6. Carrière Y, Crowder DW, Tabashnik BE (2010) Evolutionary ecology of adaptation to Bt crops. *Evol Appl* 3(5-6):561–573.
7. Liu YB, Tabashnik BE (1997) Inheritance of resistance to the *Bacillus thuringiensis* toxin Cry1C in the diamondback moth. *Appl Environ Microbiol* 63(6):2218–2223.
8. Tabashnik BE, Gassmann AJ, Crowder DW, Carrière Y (2008) Insect resistance to Bt crops: evidence versus theory. *Nat Biotechnol* 26(2):199–202.
9. Burd AD, Bradley JR, Van Duyn JW, Gould F (2000) Resistance of bollworm, *Helicoverpa zea*, to CryIA(c) toxin. *Proceedings, 2000 Beltwide Cotton Conferences, 4-8 January 2000, San Antonio, TX*, eds Dugger CP, Richter DA (National Cotton Council of America, Memphis, TN), pp 923–926.
